# Supplementary material for: Staged Percutaneous Intervention for Concurrent Chronic Total Occlusions in Patients With ST‐Segment–Elevation Myocardial Infarction: A Systematic Review and Meta‐Analysis
Source: PubMed Central journal article supplement — J Am Heart Assoc. 2018 Apr 13;7(8):e008415. doi: 10.1161/JAHA.117.008415 (PMC6015413; doi:10.1161/jaha.117.008415), 2018-04-13
Supplement: JAH3-7-e008415-s001.pdf [file JAH3-7-e008415-s001.pdf]

# **Supplemental Material**

**Table S1. Inclusion and Exclusion Criteria of Studies.**

| Study                         | Inclusion Criteria                                                                                                                                                                                                                                                                                                                                                                                                                                                                                                                                                                                                                                                                                                                                                                                         | Exclusion Criteria                                                                                                                                                                                                                                                              |
|-------------------------------|------------------------------------------------------------------------------------------------------------------------------------------------------------------------------------------------------------------------------------------------------------------------------------------------------------------------------------------------------------------------------------------------------------------------------------------------------------------------------------------------------------------------------------------------------------------------------------------------------------------------------------------------------------------------------------------------------------------------------------------------------------------------------------------------------------|---------------------------------------------------------------------------------------------------------------------------------------------------------------------------------------------------------------------------------------------------------------------------------|
| Yang et al. <sup>1</sup>      | Patients with acute STEMI treated with primary PCI between January 2005 and December 2008, from the Database of Shanghai Rui Jin Hospital Percutaneous Coronary Intervention Outcomes Program. STEMI was diagnosed according to American Heart Association criteria including symptoms consistent with ongoing myocardial ischemia $\geq 30$ min, ST-segment elevation $\geq 1$ mm in two contiguous leads or more, new left bundle branch block, or true posterior infarction.                                                                                                                                                                                                                                                                                                                            | Nine patients were excluded from analysis as they died during hospital stay (n = 6) or were lost to follow-up (n = 3).                                                                                                                                                          |
| Shi et al. <sup>2</sup>       | Patients with acute STEMI treated with primary PCI between January 2005 to June 2009 admitted to Guangdong General Hospital. Acute STEMI was diagnosed according to American Heart Association criteria including symptoms consistent with ongoing myocardial ischemia $\geq 30$ min, accompanied by an electrocardiogram with ST-segment elevation $\geq 1$ mm(0.1mV) in two contiguous leads or more, new left bundle branch block, or true posterior infarction. Multivessel was defined as $\geq 1$ stenosis $> 70\%$ of the coronary lumen diameter in $> 1$ of the noninfarct related epicardial arteries or left main stenosis $> 50\%$ . A CTO was defined as a total occlusion in a non-IRA before PCI without antegrade flow or with antegrade or retrograde filling through collateral vessels. | Not available                                                                                                                                                                                                                                                                   |
| Valenti et al. <sup>3</sup>   | Consecutive patients from the Florence PCI registry treated by successful primary PCI (Thrombolysis in Myocardial Infarction [TIMI] grade 3 flow and residual infarct artery stenosis $<30\%$ ). Coexisting none infarct-related artery (IRA) CTO. Evidence of viable myocardium in the territory supplied by the CTO vessel.                                                                                                                                                                                                                                                                                                                                                                                                                                                                              | In-hospital death during the first week after primary PCI.                                                                                                                                                                                                                      |
| Watanabe et al. <sup>4</sup>  | STEMI patients enrolled in the Coronary Revascularization Demonstrating Outcome study in Kyoto (CREDO-Kyoto) AMI registry with multi-vessel disease who underwent primary PCI within 24 hours after the symptom. Presence of CTO in the non-IRA                                                                                                                                                                                                                                                                                                                                                                                                                                                                                                                                                            | Not available                                                                                                                                                                                                                                                                   |
| Deng et al. <sup>5</sup>      | STEMI patients who underwent successful primary PCI from January 2006 to December 2014 at The General Hospital of Shenyang Military Region, China and had a non-IRA CTO lesion. CTO was defined as a flow vessel of Thrombolysis in Myocardial Infarction (TIMI) grade 0, and a complete obstruction of a native coronary artery over a period for more than 3 months.                                                                                                                                                                                                                                                                                                                                                                                                                                     | Not available                                                                                                                                                                                                                                                                   |
| Henriques et al. <sup>6</sup> | STEMI patients with a non–infarct-related chronic total occlusion undergoing successful primary PCI for STEMI (within 12 hours of onset of symptoms) from November 2007 through April 2015 in 14 centers in Europe and Canada. Successful primary PCI was defined as a residual stenosis of the culprit lesion $<30\%$ and the TIMI flow of $\geq 2$ . CTO was defined as a 100% luminal narrowing without antegrade flow or with antegrade or retrograde filling through collateral vessels. CTO located in a coronary vessel with a reference diameter of at least 2.5 mm.                                                                                                                                                                                                                               | Hemodynamic instability persisting for $>48$ h after primary PCI and factors precluding reliable CMR imaging such as persistent or permanent atrial fibrillation, severe renal insufficiency, and indications for pacemaker or implantable cardioverter-defibrillator insertion |

**Table S2. Risk of bias across individual observational studies.**

| <b>Author</b>         | <b>Newcastle-Ottawa Scale</b> |
|-----------------------|-------------------------------|
| Yang <sup>1</sup>     | 7/9                           |
| Shi <sup>2</sup>      | 7/9                           |
| Valenti <sup>3</sup>  | 6/9                           |
| Watanabe <sup>4</sup> | 6/9                           |
| Deng <sup>5</sup>     | 6/9                           |

**Table S3. Risk of bias across individual randomized control trials.**

| <b>Study Name</b>      | <b>Sequence generation</b> | <b>Allocation concealment</b> | <b>Blinding</b> | <b>Incomplete outcome data</b> | <b>Selective reporting</b> | <b>Baseline</b> | <b>Source of funding bias</b> | <b>Academic bias</b> |
|------------------------|----------------------------|-------------------------------|-----------------|--------------------------------|----------------------------|-----------------|-------------------------------|----------------------|
| Henriques <sup>6</sup> | Low                        | Low                           | High            | Moderate                       | Low                        | Low             | Low                           | Low                  |

Figure S1. Sensitivity Analysis with removal of each study one at a time

A. Major Adverse Cardiovascular Events

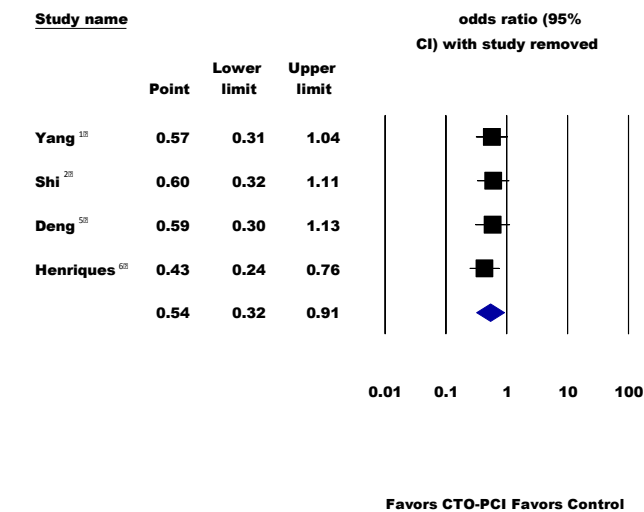

B. All-Cause Mortality

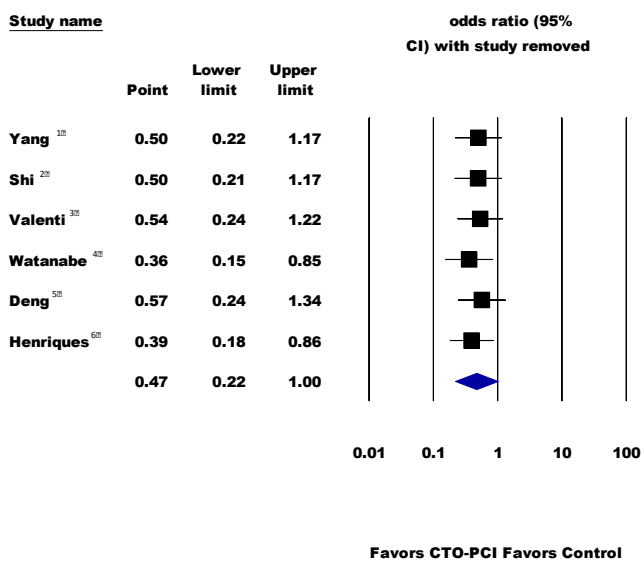

### C. Cardiovascular Mortality

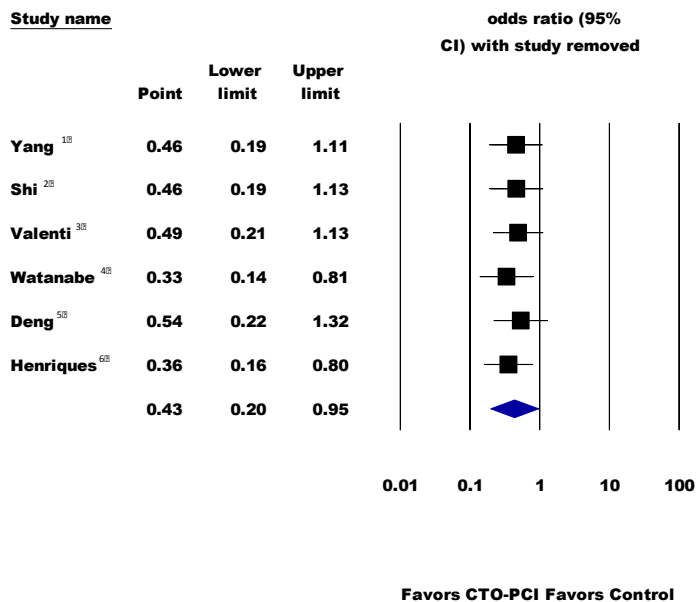

### D. Myocardial Infarction

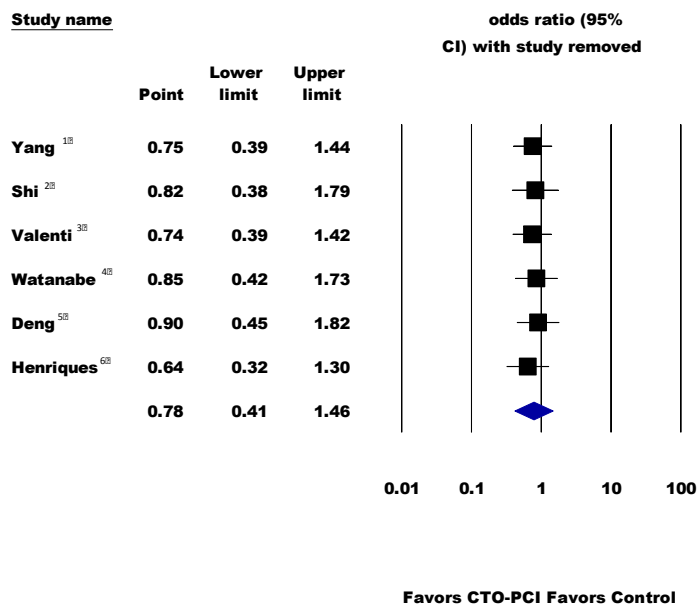

## E. Repeat Revascularization

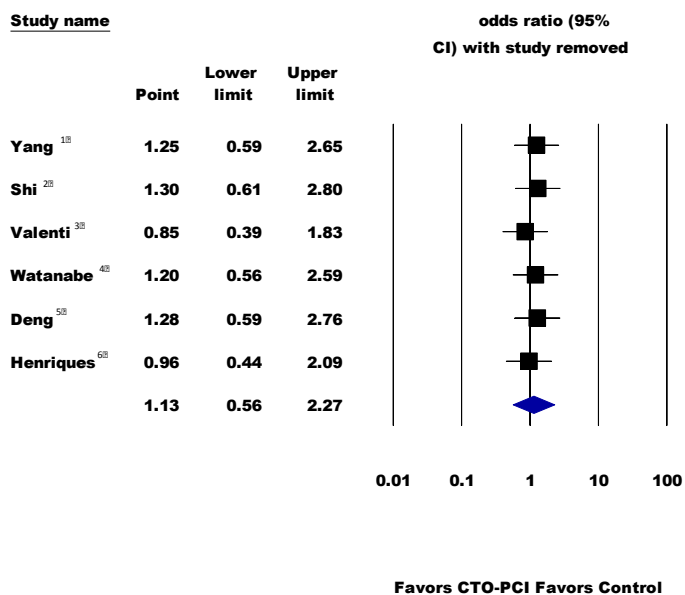

## F. Stroke

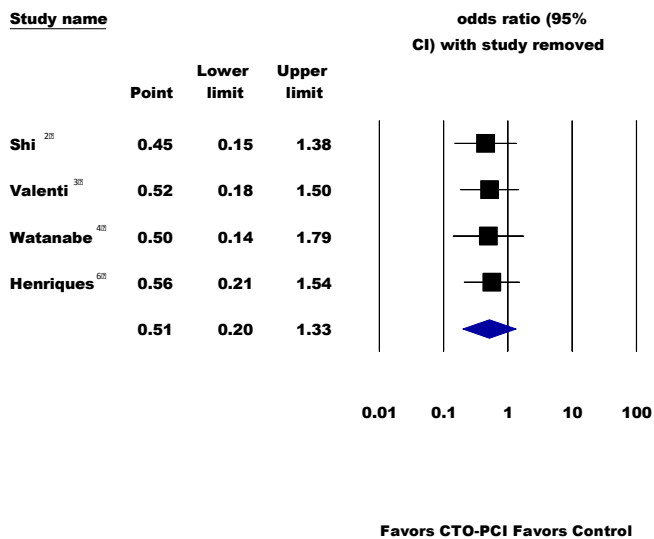

## G. Heart Failure

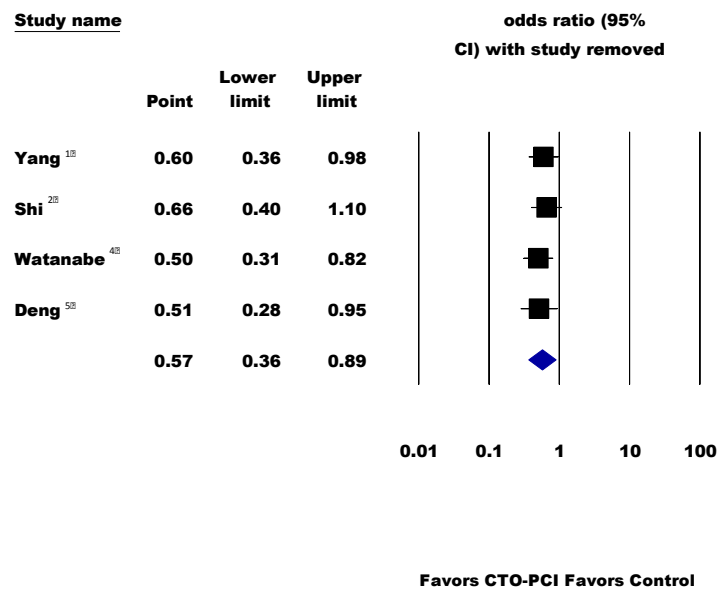



Figure S2. Cumulative analysis for Each Outcome.

### A. Major Adverse Cardiovascular Events

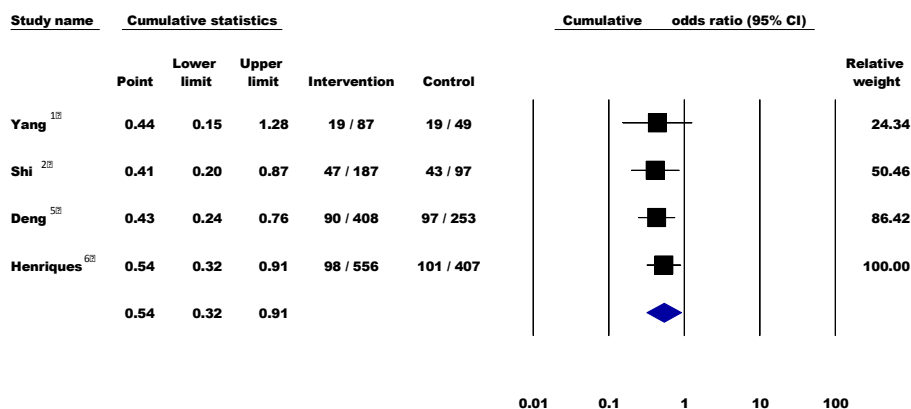

Favors CTO-PCI Favours Control

### B. All-Cause Mortality

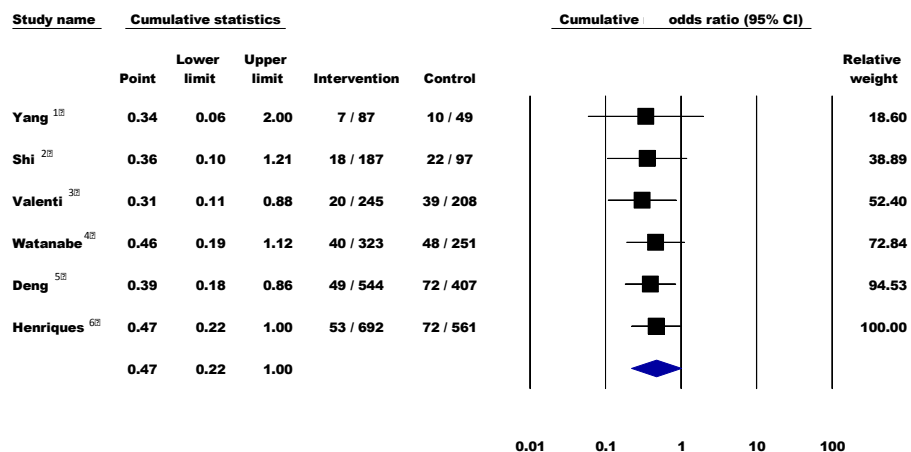

Favors CTO-PCI Favours Control

### C. Cardiovascular Mortality

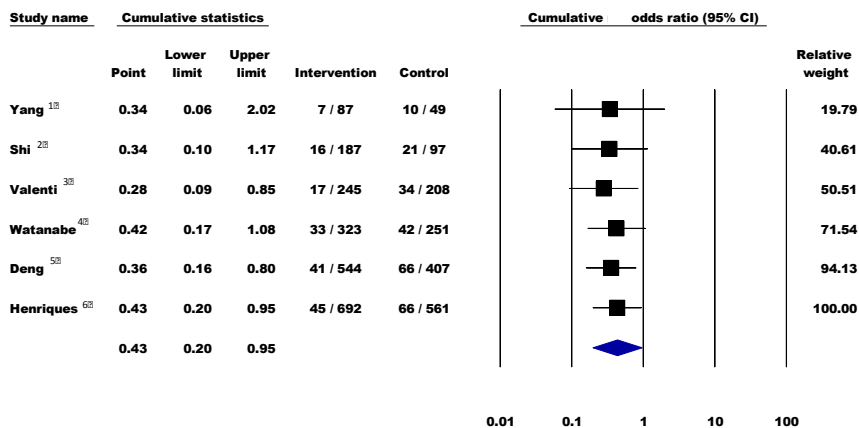

Favors CTO-PCI Favours Control

## D. Myocardial Infarction

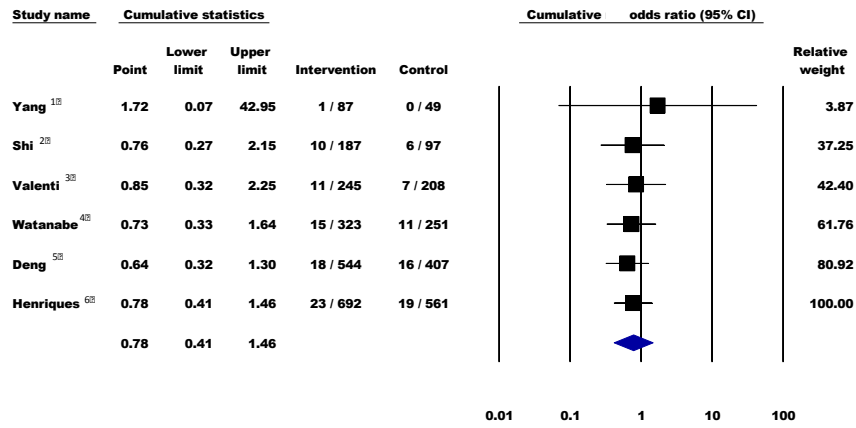

Favors CTO-PCI Favours Control

## E. Repeat Revascularization

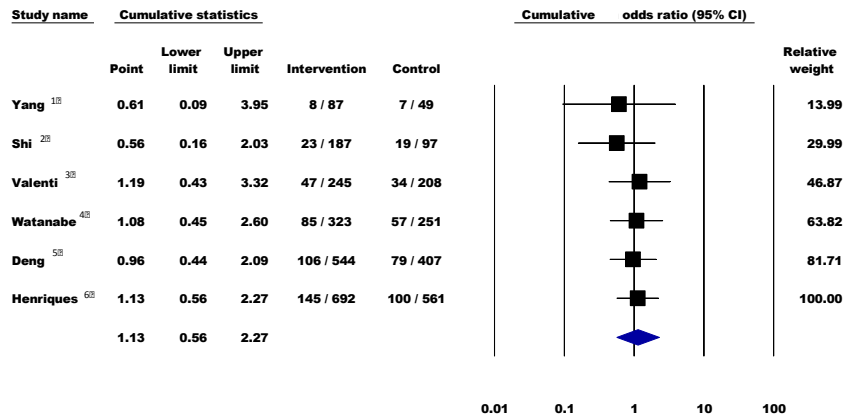

Favors CTO-PCI Favours Control

## F. Stroke

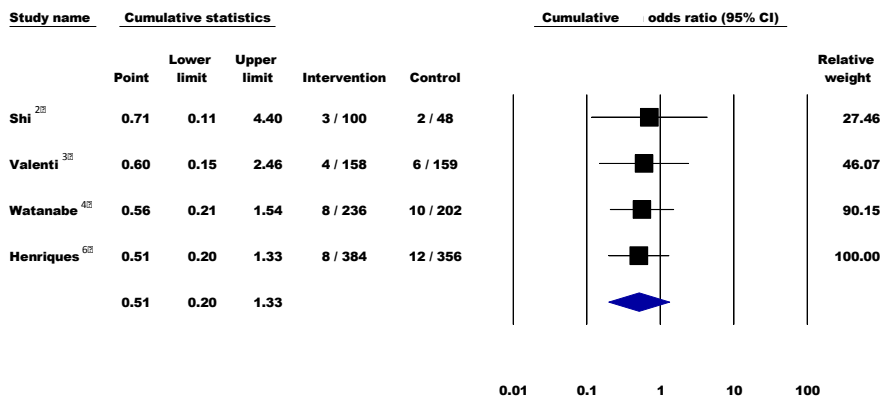

Favors CTO-PCI Favours Control

# G. Heart Failure

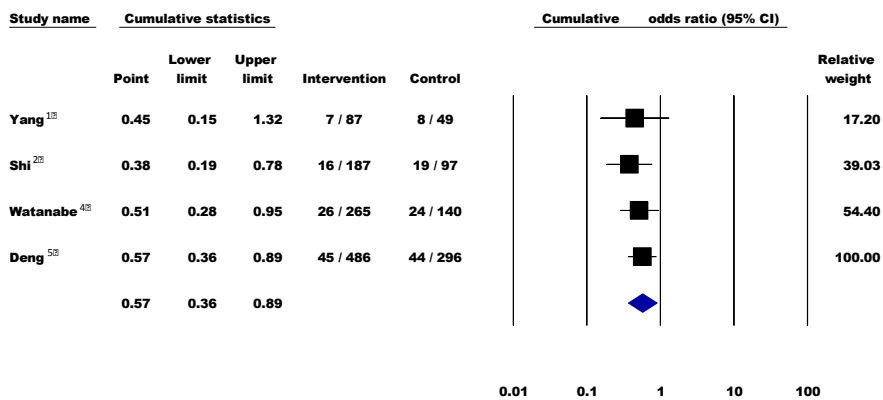

Favors CTO-PCI    Favors Control

Figure S3. Sensitivity Analysis with fixed effect model.

A. Major Adverse Cardiovascular Events

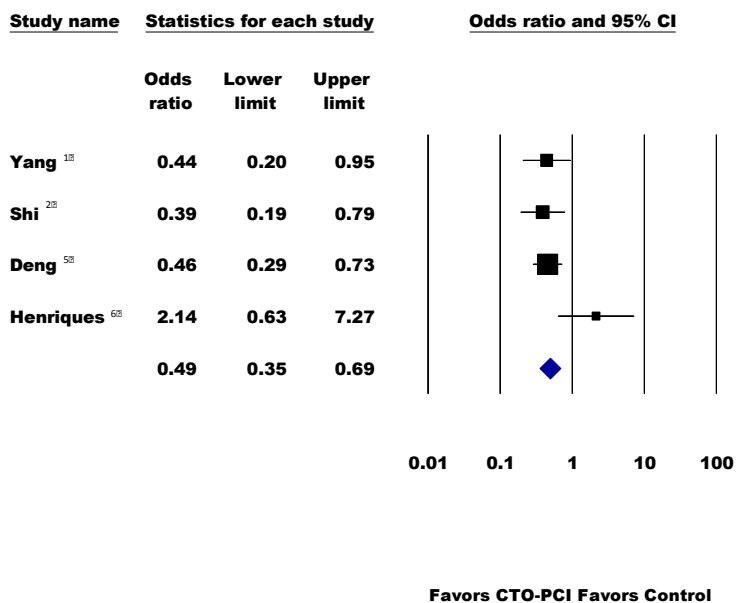

B. All-Cause Mortality

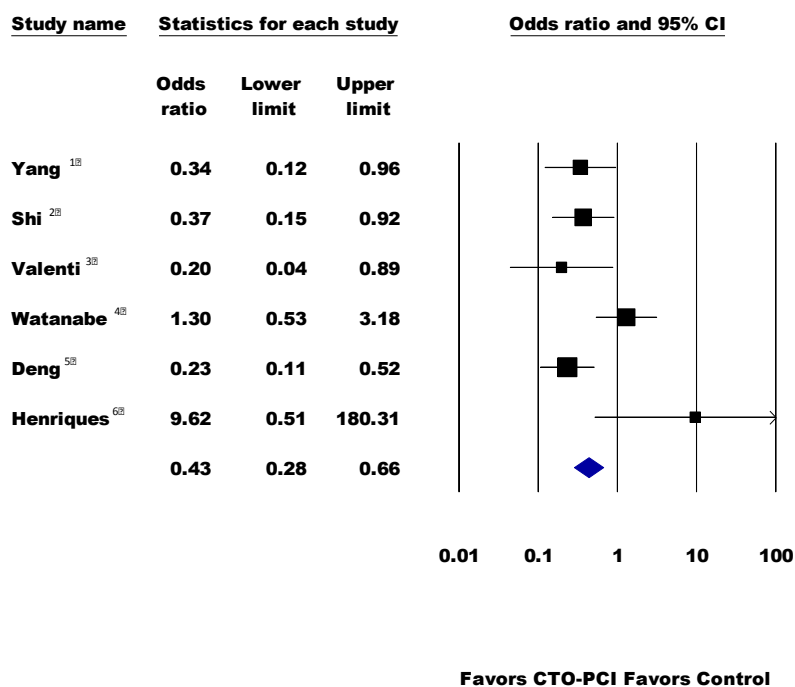

### C. Cardiovascular Mortality

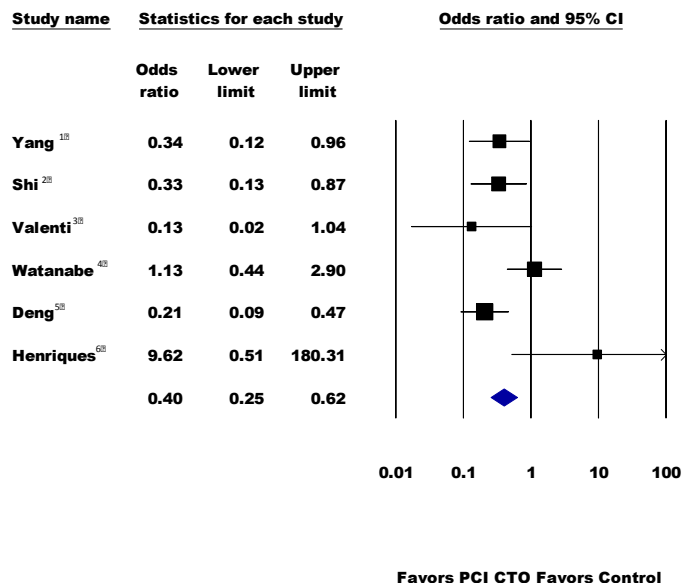

### D. Myocardial Infarction

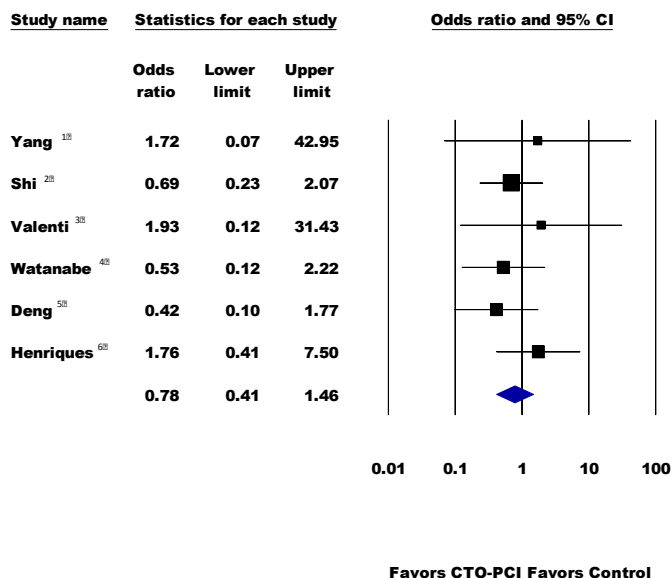

## E. Repeat Revascularization

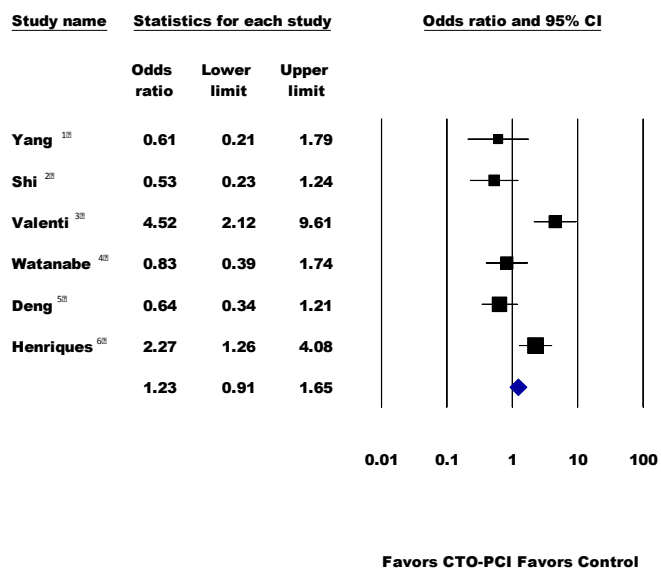

## F. Stroke

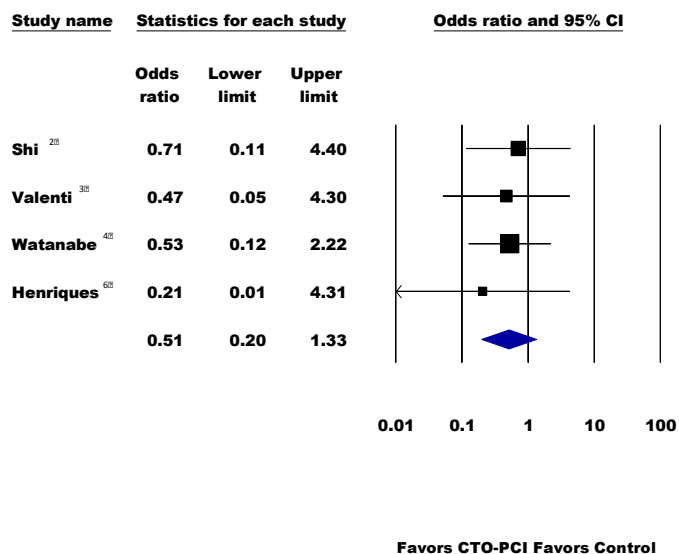

## G. Heart Failure

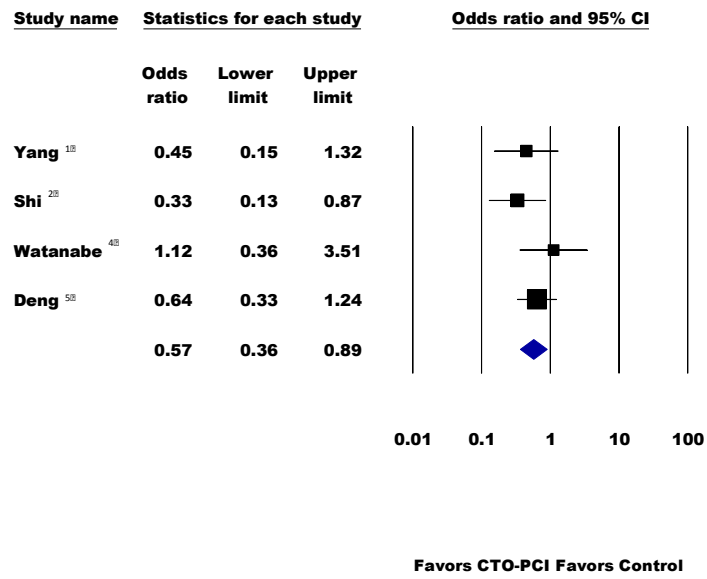

Figure S4. Meta-regression analysis by representative plots.

A. Age

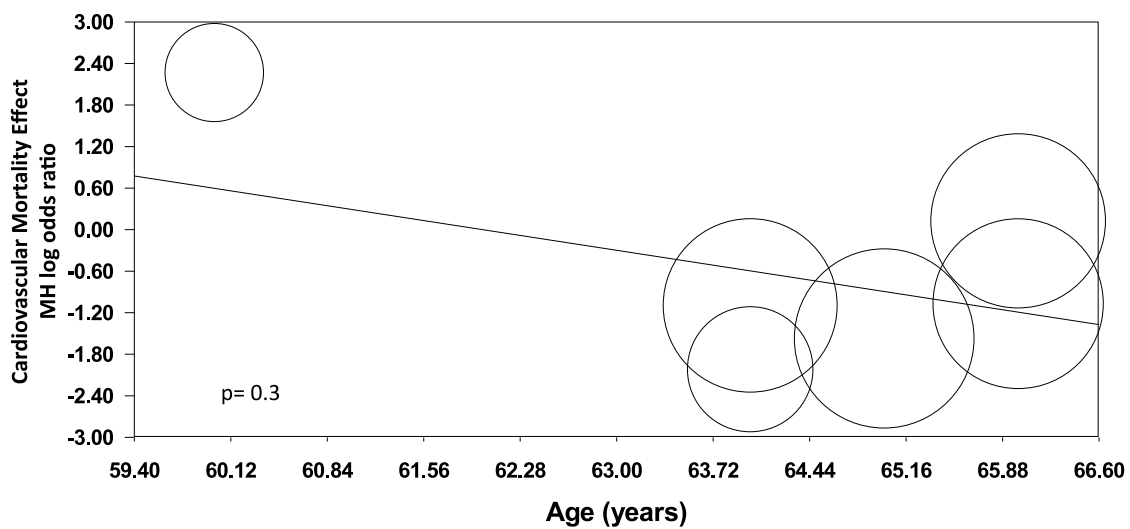

B. Male sex

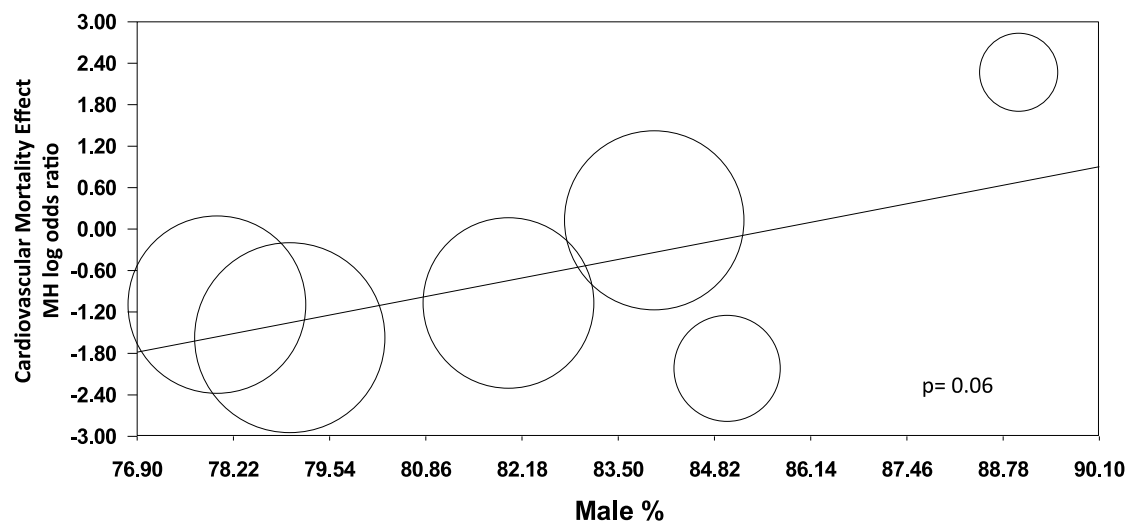

C. Hypertension

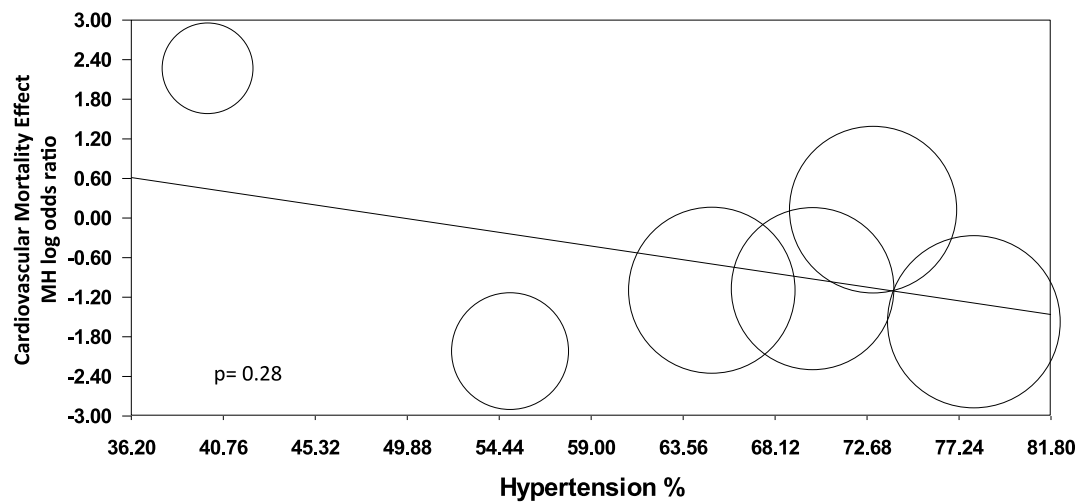



## D. Diabetes Mellitus

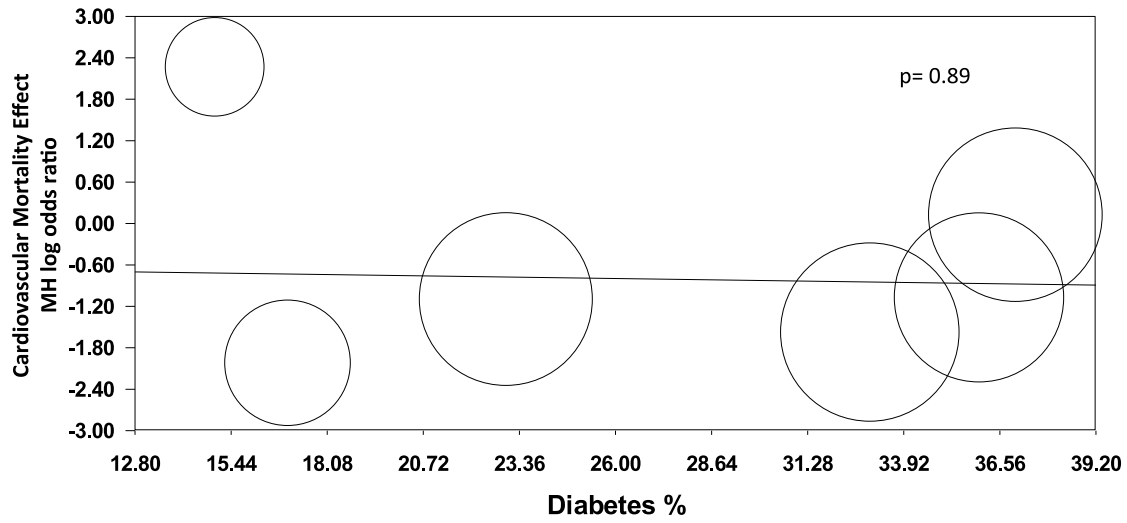

## E. Hyperlipidemia

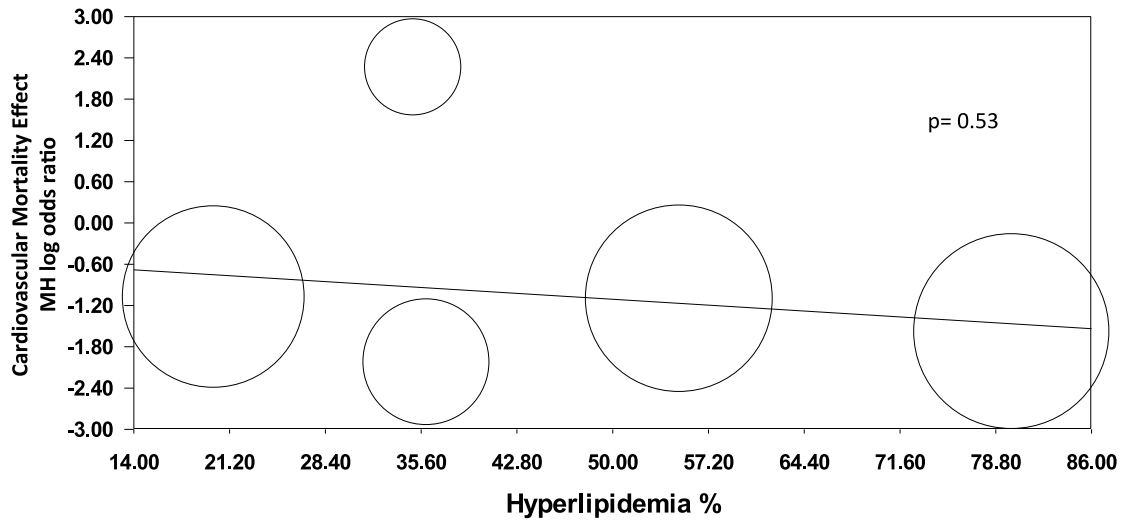

## F. Smoking

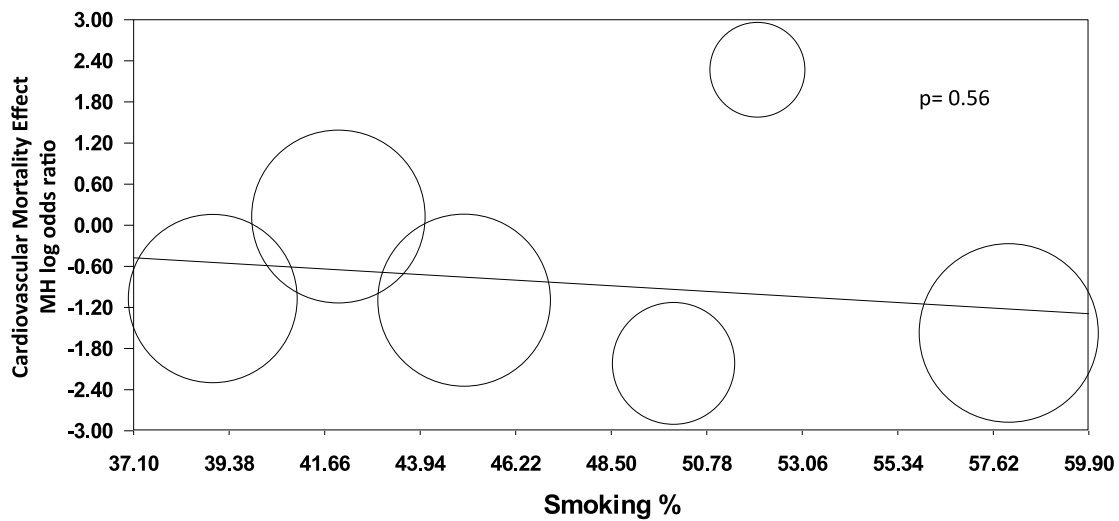

### G. 3-vessel disease

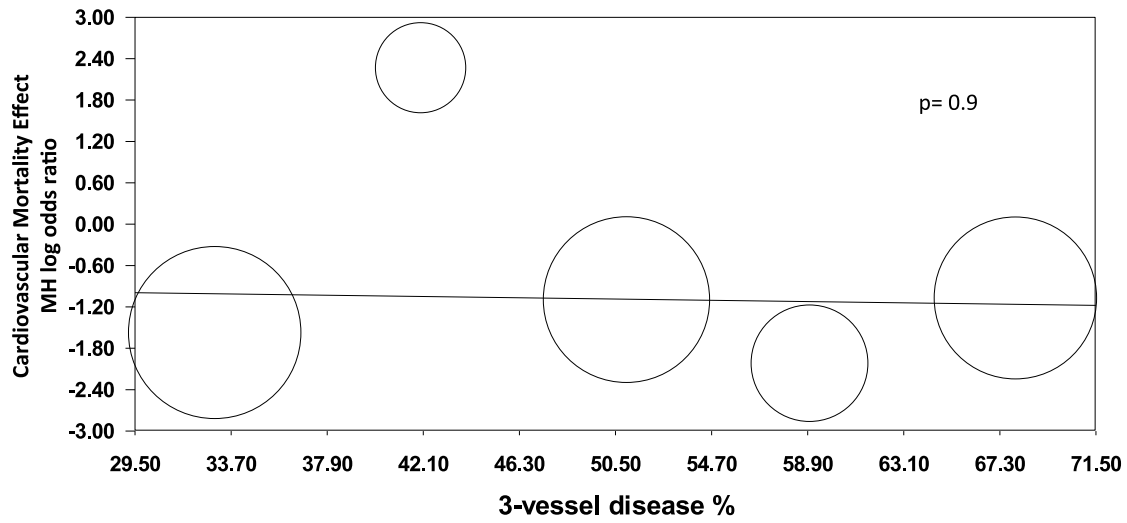

### H. Ejection Fraction

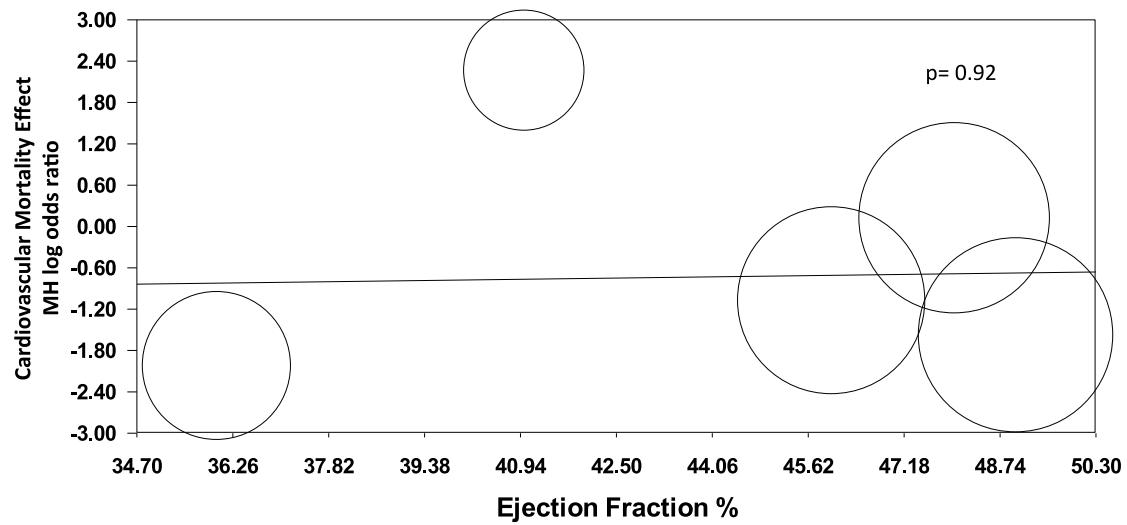

# I. CTO of the left anterior descending artery

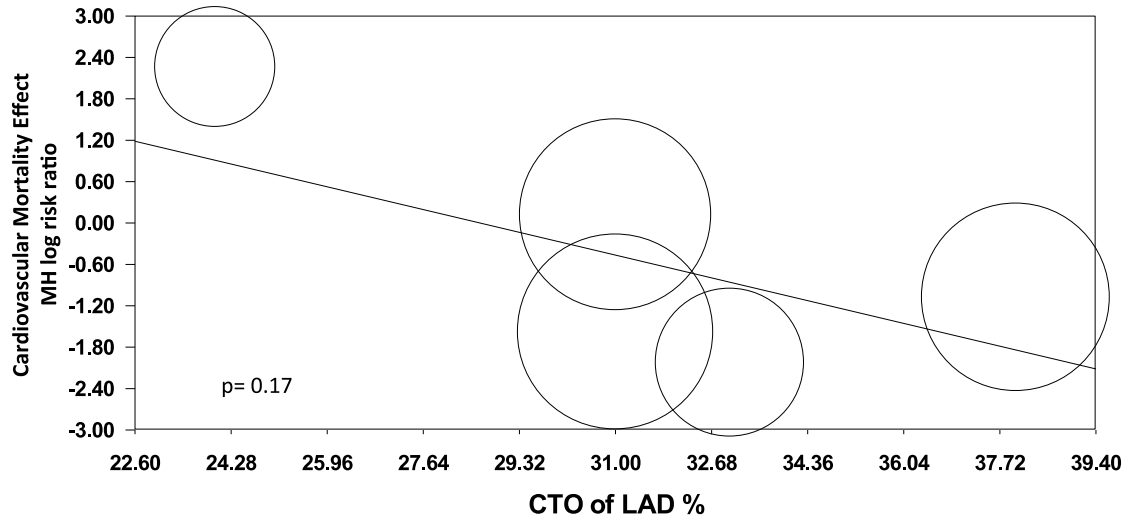

Figure S5. Funnel Plots for each outcome.

### A. Major Adverse Cardiovascular Events

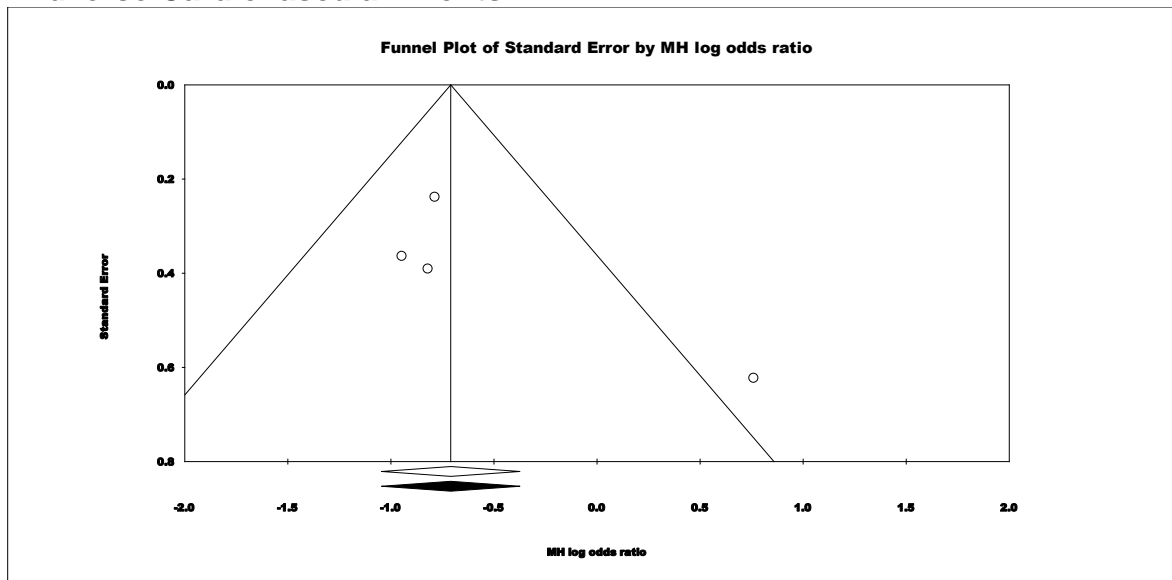

### B. All-Cause Mortality

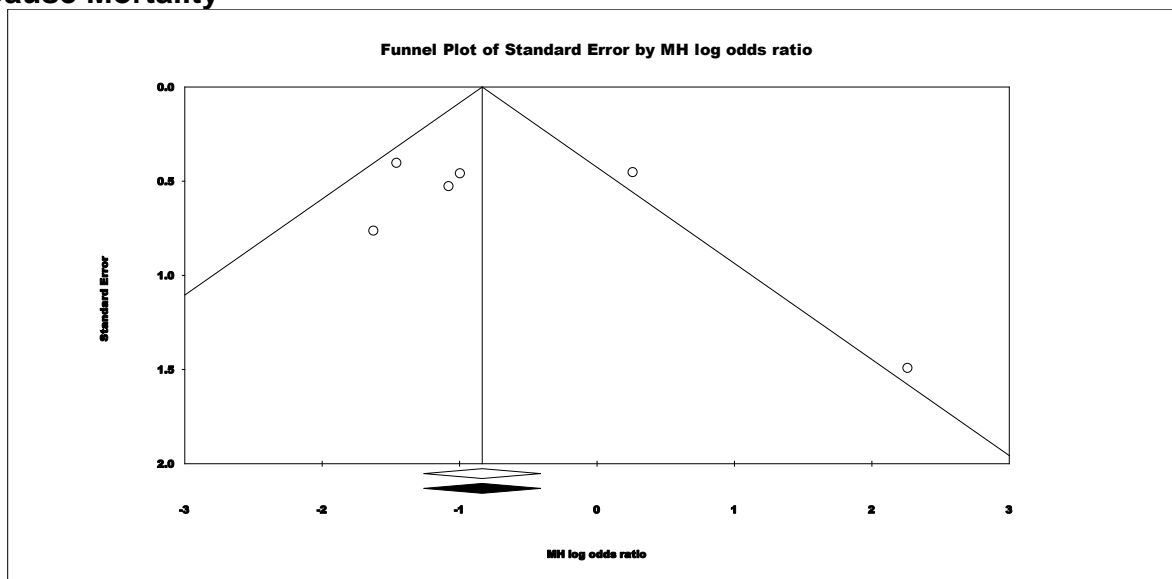

### C. Cardiovascular Mortality

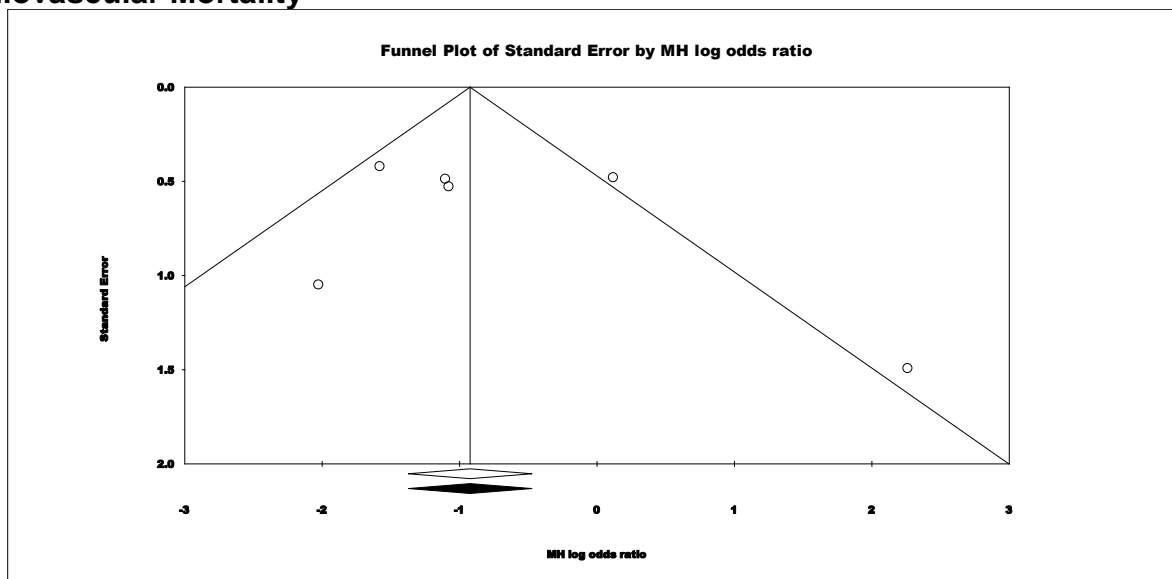

## D. Myocardial Infarction

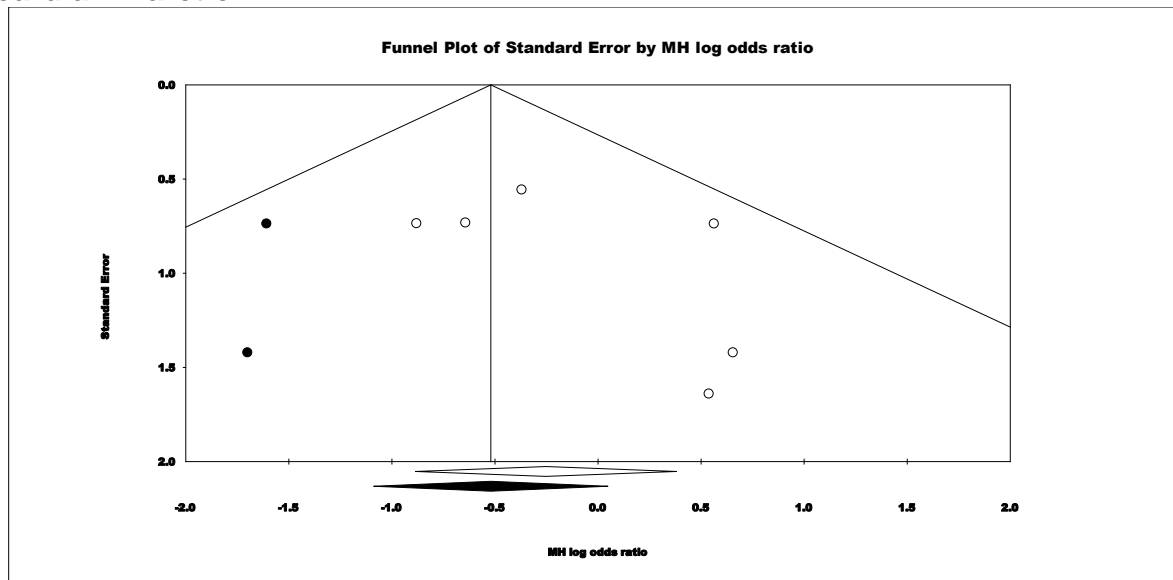

## E. Repeat Revascularization

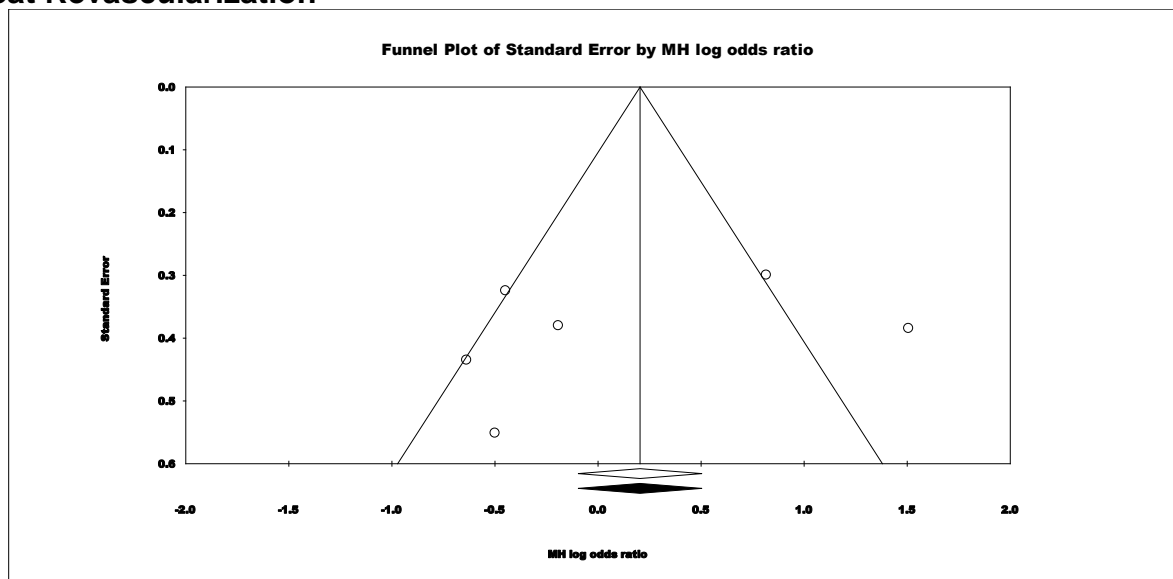

## F. Stroke

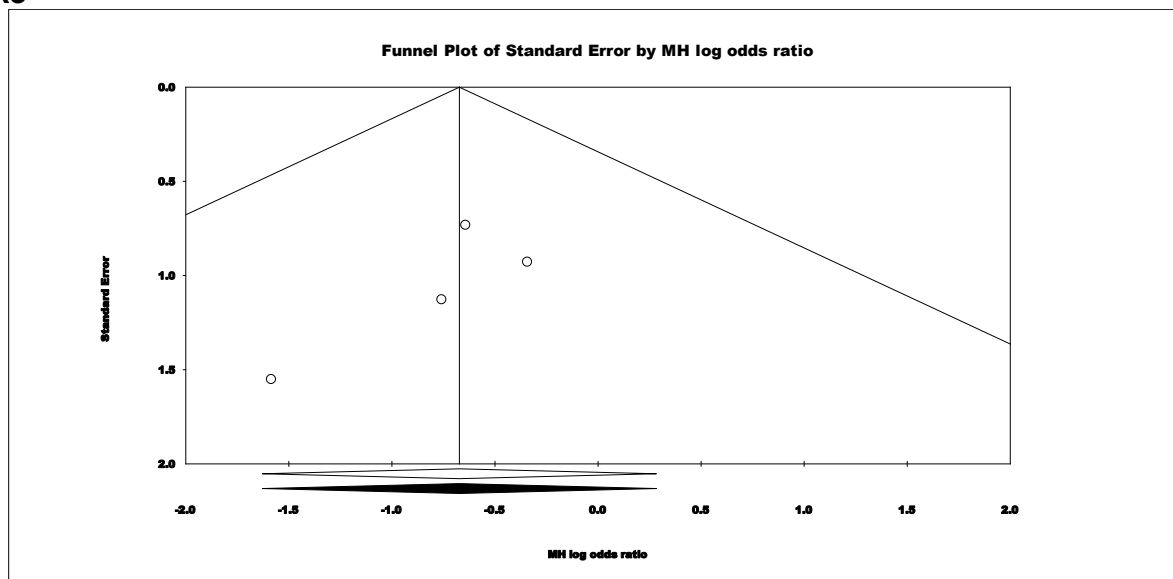

## G. Heart Failure

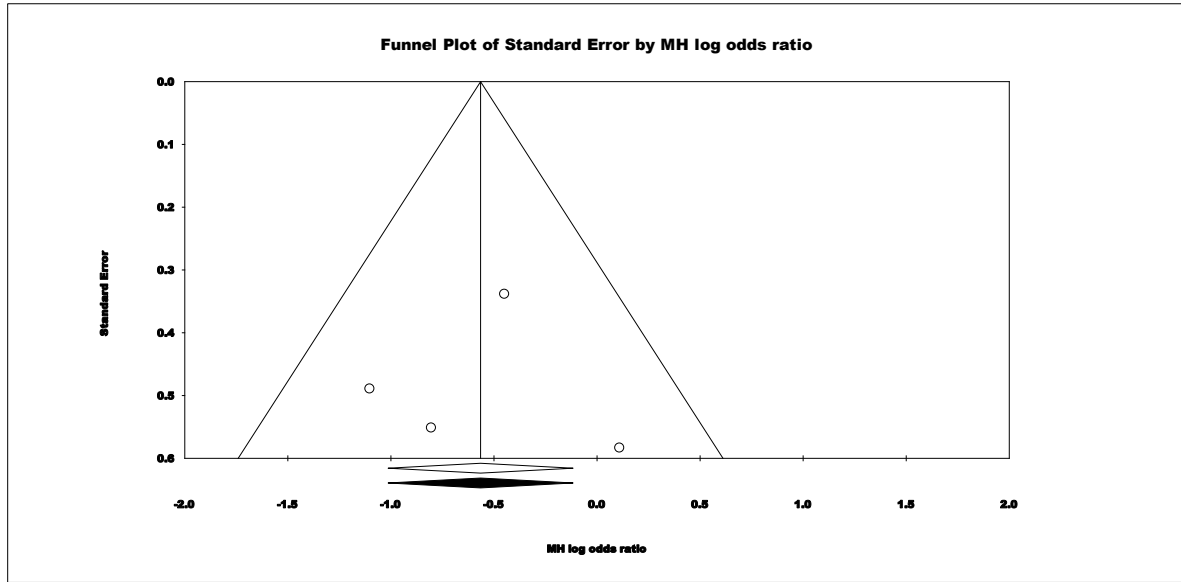

**Figure S6. Quantification of Bias for each outcome using Begg and Mazumbar rank correlation, Egger's regression intercept, Duval and Tweedie's trim and fill test.**

**A. Major Adverse Cardiovascular Events**

**Begg and Mazumdar rank correlation**

**Kendall's S statistic (P-Q)** 4.00000

**Kendall's tau without continuity correction**

Tau 0.66667  
 z-value for tau 1.35873  
 P-value (1-tailed) 0.08712  
 P-value (2-tailed) 0.17423

**Kendall's tau with continuity correction**

Tau 0.50000  
 z-value for tau 1.01905  
 P-value (1-tailed) 0.15409  
 P-value (2-tailed) 0.30818

**Egger's regression intercept**

Intercept 2.82248  
 Standard error 1.93455  
 95% lower limit (2-tailed) -5.50120  
 95% upper limit (2-tailed) 11.14615  
 t-value 1.45899  
 df 2.00000  
 P-value (1-tailed) 0.14098  
 P-value (2-tailed) 0.28196

**Duval and Tweedie's trim and fill**

|                        | Fixed Effects   |                |             | Random Effects |                |             | Q Value |             |
|------------------------|-----------------|----------------|-------------|----------------|----------------|-------------|---------|-------------|
|                        | Studies Trimmed | Point Estimate | Lower Limit | Upper Limit    | Point Estimate | Lower Limit |         | Upper Limit |
| <b>Observed values</b> |                 | 0.49182        | 0.35159     | 0.68797        | 0.53540        | 0.31619     | 0.90657 | 6.16125     |
| <b>Adjusted values</b> | 0               | 0.49182        | 0.35159     | 0.68797        | 0.53540        | 0.31619     | 0.90657 | 6.16125     |

## B. All-Cause Mortality

### Begg and Mazumdar rank correlation

**Kendall's S statistic (P-Q)** 1.00000

### Kendall's tau without continuity correction

Tau 0.06667  
 z-value for tau 0.18787  
 P-value (1-tailed) 0.42549  
 P-value (2-tailed) 0.85098

### Kendall's tau with continuity correction

Tau 0.00000  
 z-value for tau 0.00000  
 P-value (1-tailed) 0.50000  
 P-value (2-tailed) 1.00000

### Begg and Mazumdar rank correlation

**Kendall's S statistic (P-Q)** 1.00000

### Kendall's tau without continuity correction

Tau 0.06667  
 z-value for tau 0.18787  
 P-value (1-tailed) 0.42549  
 P-value (2-tailed) 0.85098

### Kendall's tau with continuity correction

Tau 0.00000  
 z-value for tau 0.00000  
 P-value (1-tailed) 0.50000  
 P-value (2-tailed) 1.00000

### Duval and Tweedie's trim and fill

|                        | Fixed Effects   |                |             |             | Random Effects |             |             | Q Value  |
|------------------------|-----------------|----------------|-------------|-------------|----------------|-------------|-------------|----------|
|                        | Studies Trimmed | Point Estimate | Lower Limit | Upper Limit | Point Estimate | Lower Limit | Upper Limit |          |
| <b>Observed values</b> |                 | 0.43373        | 0.28356     | 0.66342     | 0.46831        | 0.21889     | 1.00193     | 13.81572 |
| <b>Adjusted values</b> | 0               | 0.43373        | 0.28356     | 0.66342     | 0.46831        | 0.21889     | 1.00193     | 13.81572 |



## C. Cardiovascular Mortality

### Begg and Mazumdar rank correlation

Kendall's S statistic (P-Q) 3.00000

### Kendall's tau without continuity correction

Tau 0.20000  
 z-value for tau 0.56360  
 P-value (1-tailed) 0.28651  
 P-value (2-tailed) 0.57303

### Kendall's tau with continuity correction

Tau 0.13333  
 z-value for tau 0.37573  
 P-value (1-tailed) 0.35356  
 P-value (2-tailed) 0.70711

### Egger's regression intercept

Intercept 1.42876  
 Standard error 1.96083  
 95% lower limit (2-tailed) -4.01539  
 95% upper limit (2-tailed) 6.87291  
 t-value 0.72865  
 df 4.00000  
 P-value (1-tailed) 0.25329  
 P-value (2-tailed) 0.50658

### Duval and Tweedie's trim and fill

|                        | Studies Trimmed | Fixed Effects  |             |             | Random Effects |             |             | Q Value |
|------------------------|-----------------|----------------|-------------|-------------|----------------|-------------|-------------|---------|
|                        |                 | Point Estimate | Lower Limit | Upper Limit | Point Estimate | Lower Limit | Upper Limit |         |
| <b>Observed values</b> |                 | 0.39713        | 0.25323     | 0.62281     | 0.43158        | 0.19588     | 0.95089     | 12.941  |
| <b>Adjusted values</b> | 0               | 0.39713        | 0.25323     | 0.62281     | 0.43158        | 0.19588     | 0.95089     | 12.941  |

## D. Myocardial Infarction

### Begg and Mazumdar rank correlation

Kendall's S statistic (P-Q) 3.00000

### Kendall's tau without continuity correction

Tau 0.20000  
 z-value for tau 0.56360  
 P-value (1-tailed) 0.28651  
 P-value (2-tailed) 0.57303

### Kendall's tau with continuity correction

Tau 0.13333  
 z-value for tau 0.37573  
 P-value (1-tailed) 0.35356  
 P-value (2-tailed) 0.70711

### Egger's regression intercept

Intercept 1.01257  
 Standard error 0.94028  
 95% lower limit (2-tailed) -1.59806  
 95% upper limit (2-tailed) 3.62320  
 t-value 1.07689  
 df 4.00000  
 P-value (1-tailed) 0.17107  
 P-value (2-tailed) 0.34215

### Duval and Tweedie's trim and fill

|                        | Fixed Effects   |                |             |             | Random Effects |             |             | Q Value |
|------------------------|-----------------|----------------|-------------|-------------|----------------|-------------|-------------|---------|
|                        | Studies Trimmed | Point Estimate | Lower Limit | Upper Limit | Point Estimate | Lower Limit | Upper Limit |         |
| <b>Observed values</b> |                 | 0.77693        | 0.41248     | 1.46339     | 0.77693        | 0.41248     | 1.46339     | 2.90450 |
| <b>Adjusted values</b> | 2               | 0.59445        | 0.33683     | 1.04912     | 0.59445        | 0.33683     | 1.04912     | 6.42938 |

## E. Repeat Revascularization

### Begg and Mazumdar rank correlation

Kendall's S statistic (P-Q) -1.00000

### Kendall's tau without continuity correction

Tau -0.06667  
 z-value for tau 0.18787  
 P-value (1-tailed) 0.42549  
 P-value (2-tailed) 0.85098

### Kendall's tau with continuity correction

Tau 0.00000  
 z-value for tau 0.00000  
 P-value (1-tailed) 0.50000  
 P-value (2-tailed) 1.00000

### Egger's regression intercept

Intercept -3.89586  
 Standard error 5.26703  
 95% lower limit (2-tailed) -18.51948  
 95% upper limit (2-tailed) 10.72775  
 t-value 0.73967  
 df 4.00000  
 P-value (1-tailed) 0.25028  
 P-value (2-tailed) 0.50056

### Duval and Tweedie's trim and fill

|                        | Studies Trimmed | Fixed Effects  |             |             | Random Effects |             |             | Q Value  |
|------------------------|-----------------|----------------|-------------|-------------|----------------|-------------|-------------|----------|
|                        |                 | Point Estimate | Lower Limit | Upper Limit | Point Estimate | Lower Limit | Upper Limit |          |
| <b>Observed values</b> |                 | 1.22605        | 0.90868     | 1.65426     | 1.12785        | 0.56010     | 2.27111     | 26.10472 |
| <b>Adjusted values</b> | 0               | 1.22605        | 0.90868     | 1.65426     | 1.12785        | 0.56010     | 2.27111     | 26.10472 |

## F. Stroke

### Begg and Mazumdar rank correlation

Kendall's S statistic (P-Q) -4.00000

### Kendall's tau without continuity correction

Tau -0.66667  
z-value for tau 1.35873  
P-value (1-tailed) 0.08712  
P-value (2-tailed) 0.17423

### Kendall's tau with continuity correction

Tau -0.50000  
z-value for tau 1.01905  
P-value (1-tailed) 0.15409  
P-value (2-tailed) 0.30818

### Egger's regression intercept

Intercept -0.98881  
Standard error 0.64868  
95% lower limit (2-tailed) -3.77985  
95% upper limit (2-tailed) 1.80224  
t-value 1.52434  
df 2.00000  
P-value (1-tailed) 0.13345  
P-value (2-tailed) 0.26691

### Duval and Tweedie's trim and fill

|                        | Studies Trimmed | Fixed Effects  |             |             | Random Effects |             |             | Q Value |
|------------------------|-----------------|----------------|-------------|-------------|----------------|-------------|-------------|---------|
|                        |                 | Point Estimate | Lower Limit | Upper Limit | Point Estimate | Lower Limit | Upper Limit |         |
| <b>Observed values</b> |                 | 0.51041        | 0.19632     | 1.32704     | 0.51041        | 0.19632     | 1.32704     | 0.47813 |
| <b>Adjusted values</b> | 0               | 0.51041        | 0.19632     | 1.32704     | 0.51041        | 0.19632     | 1.32704     | 0.47813 |

## G. Heart Failure

### Begg and Mazumdar rank correlation

Kendall's S statistic (P-Q) 2.00000

### Kendall's tau without continuity correction

Tau 0.33333  
z-value for tau 0.67937  
P-value (1-tailed) 0.24845  
P-value (2-tailed) 0.49691

### Kendall's tau with continuity correction

Tau 0.16667  
z-value for tau 0.33968  
P-value (1-tailed) 0.36705  
P-value (2-tailed) 0.73410

### Egger's regression intercept

Intercept -0.08401  
Standard error 2.66251  
95% lower limit (2-tailed) -11.53985  
95% upper limit (2-tailed) 11.37184  
t-value 0.03155  
df 2.00000  
P-value (1-tailed) 0.48885  
P-value (2-tailed) 0.97770

### Duval and Tweedie's trim and fill

|                        | Studies Trimmed | Fixed Effects  |             |             | Random Effects |             |             | Q Value |
|------------------------|-----------------|----------------|-------------|-------------|----------------|-------------|-------------|---------|
|                        |                 | Point Estimate | Lower Limit | Upper Limit | Point Estimate | Lower Limit | Upper Limit |         |
| <b>Observed values</b> |                 | 0.56840        | 0.36290     | 0.89028     | 0.56840        | 0.36290     | 0.89028     | 2.84170 |
| <b>Adjusted values</b> | 0               | 0.56840        | 0.36290     | 0.89028     | 0.56840        | 0.36290     | 0.89028     | 2.84170 |

## Supplemental References:

1. Yang ZK, Zhang RY, Hu J, Zhang Q, Ding FH, Shen WF. Impact of successful staged revascularization of a chronic total occlusion in the non-infarct-related artery on long-term outcome in patients with acute st-segment elevation myocardial infarction. *Int J Cardiol.* 2013;165:76-79.
2. Shi G, He P, Liu Y, Lin Y, Yang X, Chen J, Zhou Y, Tan N. Evaluation of the effect of concurrent chronic total occlusion and successful staged revascularization on long-term mortality in patients with st-elevation myocardial infarction. *ScientificWorldJournal.* 2014;2014:756080.
3. Valenti R, Marrani M, Cantini G, Migliorini A, Carrabba N, Vergara R, Cerisano G, Parodi G, Antoniucci D. Impact of chronic total occlusion revascularization in patients with acute myocardial infarction treated by primary percutaneous coronary intervention. *The American journal of cardiology.* 2014;114:1794-1800.
4. Watanabe H, Morimoto T, Shiomi H, Furukawa Y, Nakagawa Y, Ando K, Kadota K, Kimura T. Chronic total occlusion in a non-infarct-related artery is closely associated with increased five-year mortality in patients with st-segment elevation acute myocardial infarction undergoing primary percutaneous coronary intervention (from the credo-kyoto ami registry). *EuroIntervention.* 2017;12:e1874-e1882.
5. Deng J, Wang X, Shi Y, Zhao X, Han Y. Prognostic value of the age, creatinine, and ejection fraction score for non-infarct-related chronic total occlusion revascularization after primary percutaneous intervention in acute st-elevation myocardial infarction patients: A retrospective study. *J Interv Cardiol.* 2018;31:33-40.
6. Henriques JP, Hoebbers LP, Ramunddal T, Laanmets P, Eriksen E, Bax M, Ioanes D, Suttorp MJ, Strauss BH, Barbato E, Nijveldt R, van Rossum AC, Marques KM, Elias J, van Dongen IM, Claessen BE, Tijssen JG, van der Schaaf RJ, Investigators ET. Percutaneous intervention for concurrent chronic total occlusions in patients with stemi: The explore trial. *Journal of the American College of Cardiology.* 2016;68:1622-1632.
